# Supplementary material for: Nanodynamo quantifies subcellular RNA dynamics revealing extensive coupling between steps of the RNA life cycle
Source: PubMed Central journal article supplement — Nat Commun. 2024 Sep 4;15:7725. doi: 10.1038/s41467-024-51917-2 (PMC11375098; doi:10.1038/s41467-024-51917-2), 2024-09-04
Supplement: 41467_2024_51917_MOESM3_ESM.pdf [file 41467_2024_51917_MOESM3_ESM.pdf]

## **Description of Additional Supplementary Files:**

**Supplementary Data 1:** Abundance of RNA species and the corresponding kinetic rates for untreated cells and the drug treatments
